# Supplementary material for: Does the Supplemental Nutrition Assistance Program Affect Hospital Utilization Among Older Adults? The Case of Maryland
Source: PubMed Central journal article supplement (PMC5906726; doi:10.1089/pop.2017.0055), 2018-04-01
Supplement: Supp_Table2.pdf [file Supp_Table2.pdf]

SUPPLEMENTARY TABLE S2. ASSOCIATIONS BETWEEN SUPPLEMENTAL NUTRITION ASSISTANCE PROGRAM PARTICIPATION WITH HOSPITALIZATION AND EMERGENCY DEPARTMENT VISITS, MARYLAND ADULTS AGED ≥65 YEARS ENROLLED IN BOTH MEDICARE AND MEDICAID (2010–2012)

|                                                      | <i>Any hospitalization<br/>OR (95% CI)</i>                                               | <i>Any emergency<br/>department visit<br/>OR (95% CI)</i>                             |
|------------------------------------------------------|------------------------------------------------------------------------------------------|---------------------------------------------------------------------------------------|
| Female                                               | 0.92 (0.89–0.96)                                                                         | 1.37 (1.26–1.48)                                                                      |
| Age                                                  | 1.03 (1.03–1.03)                                                                         | 1.04 (1.03–1.04)                                                                      |
| Race (missing is ref.)                               |                                                                                          |                                                                                       |
| Black                                                | 1.21 (1.15–1.28)                                                                         | 1.91 (1.68–2.17)                                                                      |
| Caucasian                                            | 1.11 (1.05–1.17)                                                                         | 1.39 (1.23–1.57)                                                                      |
| Hispanic                                             | 0.75 (0.69–0.81)                                                                         | 1.63 (1.31–2.03)                                                                      |
| Other                                                | 0.54 (0.51–0.58)                                                                         | 0.80 (0.67–0.95)                                                                      |
| Previous year SNAP participation                     | 0.96 (0.93–0.99)                                                                         | 0.98 (0.91–1.06)                                                                      |
| Chronic conditions                                   | 1.42 (1.41–1.44)                                                                         | 1.41 (1.39–1.43)                                                                      |
| Annual income (\$1,000)                              | 1.00 (1.00–1.00)                                                                         | 1.01 (1.00–1.01)                                                                      |
| Medicaid eligible via spend-down                     | 2.30 (2.03–2.61)                                                                         | 2.27 (1.41–3.63)                                                                      |
| Partial Medicaid eligibility                         | 0.68 (0.65–0.72)                                                                         | 0.78 (0.71–0.85)                                                                      |
| Proportion of year covered by Medicaid               | 0.15 (0.14–0.16)                                                                         | 0.09 (0.06–0.12)                                                                      |
| Previous year inpatient hospital days/ED count       | 1.07 (1.06–1.08)                                                                         | 2.32 (2.02–2.68)                                                                      |
| Medicaid community waiver                            | 0.92 (0.88–0.97)                                                                         | 1.33 (1.15–1.55)                                                                      |
| 2011 year dummy                                      | 0.60 (0.58–0.63)                                                                         | 0.38 (0.32–0.45)                                                                      |
| 2012 year dummy                                      | 0.63 (0.60–0.67)                                                                         | 0.43 (0.37–0.50)                                                                      |
|                                                      | <i>Number of inpatient<br/>hospital days<br/>among the hospitalized<br/>IRR (95% CI)</i> | <i>Number of emergency<br/>department visits<br/>among utilizers<br/>IRR (95% CI)</i> |
| Female                                               | 0.80 (0.66–0.95)                                                                         | 0.85 (0.82–0.87)                                                                      |
| Age                                                  | 0.99 (0.98–0.99)                                                                         | 1.00 (1.00–1.00)                                                                      |
| Race (missing is ref.)                               |                                                                                          |                                                                                       |
| Black                                                | 0.97 (0.91–1.02)                                                                         | 1.19 (1.13–1.24)                                                                      |
| Caucasian                                            | 0.95 (0.85–1.05)                                                                         | 1.07 (1.02–1.11)                                                                      |
| Hispanic                                             | 0.79 (0.71–0.88)                                                                         | 0.71 (0.66–0.76)                                                                      |
| Other                                                | 0.78 (0.72–0.84)                                                                         | 0.52 (0.49–0.56)                                                                      |
| Previous year SNAP participation                     | 0.92 (0.82–1.03)                                                                         | 0.98 (0.95–1.01)                                                                      |
| Chronic conditions                                   | 1.02 (1.02–1.03)                                                                         | 1.13 (1.12–1.13)                                                                      |
| Annual income (\$1,000)                              | 1.01 (1.00–1.01)                                                                         | 1.00 (1.00–1.00)                                                                      |
| Medicaid eligible via spend-down                     | 1.01 (0.91–1.13)                                                                         | 1.27 (1.18–1.38)                                                                      |
| Partial Medicaid eligibility                         | 0.87 (0.77–0.97)                                                                         | 0.87 (0.84–0.89)                                                                      |
| Proportion of year covered by Medicaid               | 0.58 (0.51–0.67)                                                                         | 0.75 (0.72–0.79)                                                                      |
| Previous year inpatient hospital days/ED visit count | 1.01 (1.01–1.01)                                                                         | 1.09 (1.08–1.09)                                                                      |
| Medicaid community waiver                            | 0.90 (0.85–0.95)                                                                         | 0.99 (0.95–1.03)                                                                      |
| 2011 year dummy                                      | 0.96 (0.92–1.00)                                                                         | 0.98 (0.95–1.02)                                                                      |
| 2012 year dummy                                      | 1.05 (0.88–1.25)                                                                         | 1.02 (0.99–1.06)                                                                      |

Associations estimated from zero-inflated negative binomial regression estimated with robust standard errors. All models adjusted for autoregressive effects, study year, age, sex, race/ethnicity, annual income, partial Medicaid eligibility, Medicaid spend-down eligibility, chronic condition count, Medicaid community waiver status and proportion of year participating in Medicaid.

CI, confidence interval; ED, emergency department; IRR, incident rate ratio; OR, odds ratio.
