# Supplementary material for: Does the Supplemental Nutrition Assistance Program Affect Hospital Utilization Among Older Adults? The Case of Maryland
Source: Popul Health Manag. 2018 Apr 1;21(2):88–95. doi: 10.1089/pop.2017.0055 (PMC5906726; doi:10.1089/pop.2017.0055)
Supplement: Supplemental data [file Supp_Table1.pdf]

# Supplementary Data

SUPPLEMENTARY TABLE S1. CHARACTERISTICS OF MARYLAND ADULTS AGED ≥65 DUALY ENROLLED IN BOTH MEDICARE AND MEDICAID, BY SUPPLEMENTAL NUTRITION ASSISTANCE PROGRAM PARTICIPATION, 2010–2012

|                                   | 2010 (n = 46,447) |                     |                 | 2011 (n = 49,189) |                     |                 | 2012 (n = 53,646) |                     |                 |
|-----------------------------------|-------------------|---------------------|-----------------|-------------------|---------------------|-----------------|-------------------|---------------------|-----------------|
|                                   | SNAP              |                     | Total           | SNAP              |                     | Total           | SNAP              |                     | Total           |
|                                   | participants (%)  | nonparticipants (%) |                 | participants (%)  | nonparticipants (%) |                 | participants (%)  | nonparticipants (%) |                 |
| Age                               | 19,152 (41)       | 27,295 (59)         |                 | 24,523 (50)       | 24,568 (50)         |                 | 28,628 (53)       | 25,018 (47)         |                 |
| 65–69                             | 4976 (26)         | 6696 (25)           | <i>P</i> < 0.01 | 6088 (25)         | 6943 (25)           | <i>P</i> < 0.01 | 7305 (29)         | 7367 (26)           | <i>P</i> < 0.01 |
| 70–74                             | 4952 (26)         | 5387 (20)           | 6248 (22)       | 4534 (17)         | 10,782 (23)         | 13,031 (28)     | 4406 (18)         | 7215 (25)           | 14,672 (27)     |
| 75–79                             | 3827 (20)         | 5002 (18)           | 5001 (19)       | 4316 (16)         | 5017 (20)           | 9,782 (23)      | 4164 (17)         | 5812 (20)           | 11,621 (22)     |
| 80–84                             | 2922 (15)         | 4496 (16)           | 3783 (16)       | 3704 (14)         | 7487 (16)           | 10,782 (23)     | 3693 (15)         | 4405 (15)           | 9976 (19)       |
| ≥85                               | 2475 (13)         | 5714 (21)           | 3403 (18)       | 3403 (18)         | 8474 (18)           | 7487 (16)       | 5450 (22)         | 3829 (13)           | 8098 (15)       |
| Gender                            |                   |                     |                 |                   |                     |                 |                   |                     |                 |
| Female                            | 13,036 (68)       | 19,512 (71)         | <i>P</i> < 0.01 | 16,921 (88)       | 17,114 (63)         | <i>P</i> < 0.01 | 19,955 (70)       | 17,183 (69)         | <i>P</i> = 0.01 |
| Male                              | 6116 (32)         | 7783 (29)           | 13,899 (30)     | 7602 (40)         | 7454 (27)           | 34,035 (73)     | 8673 (30)         | 7835 (31)           | 37,138 (69)     |
| Race/Ethnicity                    |                   |                     |                 |                   |                     |                 |                   |                     |                 |
| Black                             | 6098 (32)         | 9314 (34)           | <i>P</i> < 0.01 | 8453 (34)         | 7775 (32)           | <i>P</i> < 0.01 | 10,191 (36)       | 7513 (30)           | <i>P</i> < 0.01 |
| Caucasian                         | 7826 (41)         | 11,169 (41)         | 18,995 (41)     | 9163 (37)         | 10,351 (42)         | 16,228 (33)     | 10,560 (37)       | 10,474 (42)         | 17,704 (33)     |
| Hispanic                          | 1045 (5)          | 1330 (5)            | 2375 (5)        | 1399 (6)          | 1127 (5)            | 19,514 (40)     | 1694 (6)          | 1175 (5)            | 21,034 (39)     |
| Other                             | 3035 (16)         | 2916 (11)           | 5951 (13)       | 3762 (15)         | 2520 (10)           | 2526 (5)        | 4281 (15)         | 2554 (10)           | 2869 (5)        |
| Unknown                           | 1148 (6)          | 2566 (9)            | 3714 (8)        | 1746 (7)          | 2795 (11)           | 6282 (13)       | 1902 (7)          | 3302 (13)           | 6835 (13)       |
| Medicaid community wavier         |                   |                     | <i>P</i> < 0.01 |                   |                     | <i>P</i> < 0.01 |                   |                     | <i>P</i> = 0.36 |
| No                                | 17,146 (90)       | 25,183 (92)         | 42,329 (91)     | 21,278 (87)       | 21,744 (89)         | 43,022 (88)     | 24,903 (87)       | 21,829 (87)         | 46,732 (87)     |
| Yes                               | 2006 (10)         | 2112 (8)            | 4118 (9)        | 3245 (13)         | 2824 (11)           | 6069 (12)       | 3725 (13)         | 3189 (13)           | 6914 (13)       |
| Partially Medicaid eligible       |                   |                     | <i>P</i> = 0.05 |                   |                     | <i>P</i> < 0.01 |                   |                     | <i>P</i> < 0.01 |
| No                                | 11,582 (60)       | 16,150 (59)         | 27,732 (60)     | 15,360 (63)       | 12,833 (52)         | 28,193 (57)     | 16,984 (59)       | 14,363 (57)         | 31,347 (58)     |
| Yes                               | 7570 (40)         | 11,145 (41)         | 18,715 (40)     | 9163 (37)         | 11,735 (48)         | 20,898 (43)     | 11,644 (41)       | 10,655 (43)         | 22,299 (42)     |
| Medicaid eligible by spenddown    |                   |                     | <i>P</i> = 0.15 |                   |                     | <i>P</i> < 0.01 |                   |                     | <i>P</i> < 0.01 |
| No                                | 18,839 (98)       | 26,895 (99)         | 45,734 (98)     | 24,181 (99)       | 24,070 (98)         | 48,251 (98)     | 28,207 (99)       | 24,516 (98)         | 52,723 (98)     |
| Yes                               | 313 (2)           | 400 (1)             | 713 (2)         | 342 (1)           | 498 (2)             | 840 (2)         | 421 (1)           | 502 (2)             | 923 (2)         |
| Admitted to hospital              |                   |                     | <i>P</i> < 0.01 |                   |                     | <i>P</i> < 0.01 |                   |                     | <i>P</i> < 0.01 |
| No                                | 10,771 (75)       | 22,323 (70)         | 33,094 (71)     | 15,249 (75)       | 20,908 (72)         | 36,157 (74)     | 17,462 (76)       | 22,569 (73)         | 40,031 (74)     |
| Yes                               | 3680 (26)         | 9719 (30)           | 13,399 (29)     | 4979 (25)         | 8053 (28)           | 13,032 (27)     | 5439 (24)         | 8336 (27)           | 13,775 (26)     |
| Had emergency department visit    |                   |                     | <i>P</i> < 0.01 |                   |                     | <i>P</i> < 0.02 |                   |                     | <i>P</i> = 0.66 |
| No                                | 8937 (62)         | 18,635 (58)         | 27,572 (59)     | 12,081 (60)       | 16,986 (59)         | 29,067 (59)     | 13,456 (59)       | 18,218 (59)         | 31,674 (59)     |
| Yes                               | 5514 (38)         | 13,407 (42)         | 18,921 (41)     | 8147 (40)         | 11,975 (41)         | 20,122 (41)     | 9445 (41)         | 12,687 (41)         | 22,132 (41)     |
| Mean number of chronic conditions |                   |                     | <i>P</i> < 0.01 |                   |                     | <i>P</i> < 0.01 |                   |                     | <i>P</i> < 0.01 |
|                                   | 2.4               | 2.1                 | 2.2             | 3.3               | 3                   | 3.1             | 2.6               | 2.9                 | 2.8             |

SNAP, Supplemental Nutrition Assistance Program.
